# Supplementary material for: Cadmium tolerance and phytochelatin content of Arabidopsis seedlings over-expressing the phytochelatin synthase gene AtPCS1
Source: PubMed Central journal article supplement — J Exp Bot. 2011 Aug 12;62(15):5509–19. doi: 10.1093/jxb/err228 (PMC3223047; doi:10.1093/jxb/err228), 2011-08-12
Supplement: supp_err228_00065201_file001.pdf [file supp_err228_00065201_file001.pdf]

**Cadmium tolerance and phytochelatin content of *Arabidopsis* seedlings overexpressing the phytochelatin synthase gene *AtPCS1***

**Patrizia Brunetti, Letizia Zanella, Alessandra Proia, Angelo De Paolis, Giuseppina Falasca, Maria Maddalena Altamura, Luigi Sanità di Toppi, Paolo Costantino, Maura Cardarelli**

**Figure S1**

Quantitative analysis of *AtGSH1* transcript in AtPCSox seedlings.

Wild type, AtPCSox-1 and AtPCSox-5 seedlings were grown in the presence or absence of 250  $\mu$ M GSH.

Real-time RT-PCR of mRNA extracted from wild type and AtPCSox seedlings after 9 days of growth. Data are expressed as a mean value ( $\pm$  SEM) of *AtGSH1* cDNA levels relative to actin cDNA.

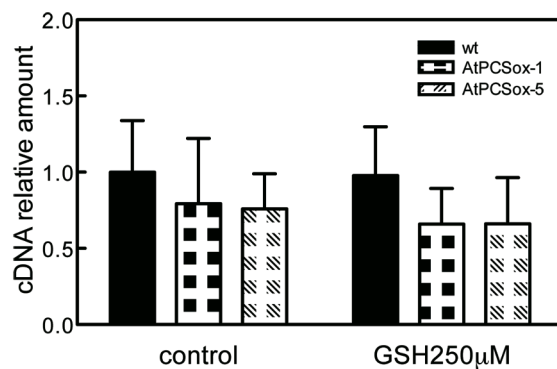

**S1**
